# Supplementary material
Source: PubMed Central journal article supplement (PMC9256865)
Supplement: NIHMS1765322-supplement-1.pdf [file NIHMS1765322-supplement-1.pdf]

**Supplemental Table 1.** Geometric means (pmol/L) and 95% CIs of serum estrogens/estrogen metabolites by burns associated with hair relaxer frequency of burns in postmenopausal control women not using menopausal hormone therapy in the Ghana Breast Health Study

|                                 | Geometric Mean (95% Confidence Interval) |                        |                        |                        | ptrend      |
|---------------------------------|------------------------------------------|------------------------|------------------------|------------------------|-------------|
|                                 | Never had burns                          | 1-2 times burned       | 3-4 times burned       | 5+ times burned        |             |
| Estrone                         | 358.09 (253.59-505.66)                   | 407.48 (281.69-589.45) | 333.98 (224.67-496.47) | 404.17 (266.19-613.68) | 0.39        |
| Unconjugated                    | 63.18 (53.73-74.29)                      | 74.13 (61.15-89.88)    | 63.17 (52.30-76.31)    | 73.59 (57.77-93.74)    | 0.09        |
| Conjugated                      | 277.12 (185.66-413.64)                   | 317.15 (206.29-487.59) | 257.55 (162.32-408.63) | 309.52 (191.24-500.95) | 0.47        |
| Estradiol                       | 36.15 (28.00-46.69)                      | 39.13 (28.94-52.91)    | 34.62 (25.44-47.11)    | 40.68 (28.55-57.96)    | 0.31        |
| Unconjugated                    | 23.68 (19.24-29.14)                      | 25.92 (19.83-33.88)    | 22.61 (17.41-29.36)    | 29.10 (20.97-40.38)    | 0.13        |
| Conjugated                      | 6.17 (3.33-11.42)                        | 7.35 (3.80-14.22)      | 7.06 (3.58-13.94)      | 7.03 (3.49-14.19)      | 0.33        |
| 2-Hydroxyestrone                | 57.45 (51.19-64.47)                      | 57.01 (49.49-65.67)    | 55.43 (48.85-64.21)    | 61.25 (50.13-74.83)    | 0.69        |
| 2-Hydroxyestradiol              | 9.82 (7.52-12.83)                        | 9.09 (6.81-12.12)      | 9.48 (7.01-12.81)      | 10.04 (7.32-13.77)     | 0.63        |
| 2-Methoxyestrone                | 23.07 (19.25-27.66)                      | 22.95 (18.54-28.42)    | 21.39 (17.49-26.15)    | 26.25 (20.41-33.77)    | 0.34        |
| Unconjugated                    | 8.78 (7.15-10.79)                        | 9.22 (7.24-11.73)      | 9.30 (7.39-11.72)      | 11.05 (8.23-14.85)     | <b>0.04</b> |
| Conjugated                      | 11.72 (8.88-15.47)                       | 10.50 (7.60-14.51)     | 10.58 (7.72-15.93)     | 10.66 (7.14-15.93)     | 0.40        |
| 2-Methoxyestradiol              | 13.19 (10.60-16.43)                      | 12.99 (10.30-16.39)    | 13.58 (10.60-17.40)    | 12.75 (9.80-16.59)     | 0.47        |
| Unconjugated                    | 3.15 (2.55-3.90)                         | 3.08 (2.44-3.87)       | 3.20 (2.56-4.00)       | 4.04 (3.12-5.22)       | <b>0.01</b> |
| Conjugated                      | 8.65 (6.29-11.90)                        | 8.94 (6.39-12.51)      | 8.23 (5.60-12.10)      | 7.07 (4.76-10.48)      | 0.74        |
| 2-Hydroxyestrone-3-methyl ether | 3.75 (3.04-4.63)                         | 4.17 (3.27-5.33)       | 3.80 (2.99-4.84)       | 4.01 (3.09-5.20)       | 0.23        |
| 4-Hydroxyestrone                | 8.44 (6.21-11.47)                        | 8.15 (5.90-11.26)      | 7.51 (5.37-10.49)      | 8.09 (5.62-11.65)      | 0.76        |
| 4-Methoxyestrone                | 3.76 (3.07-4.60)                         | 3.57 (2.86-4.47)       | 3.75 (2.97-4.72)       | 4.14 (3.22-5.31)       | 0.15        |
| 4-Methoxyestradiol              | 1.53 (1.24-1.88)                         | 1.58 (1.26-1.98)       | 1.59 (1.25-2.03)       | 1.52 (1.18-1.97)       | 0.70        |
| 16 $\alpha$ -Hydroxyestrone     | 37.52 (28.14-50.04)                      | 35.42 (25.86-48.52)    | 34.64 (25.05-47.91)    | 42.26 (29.18-61.20)    | 0.46        |
| Estriol                         | 94.30 (76.60-116.08)                     | 104.20 (82.46-131.68)  | 83.91 (66.44-105.97)   | 102.18 (77.42-134.86)  | 0.31        |
| Unconjugated                    | 9.53 (8.39-10.81)                        | 9.98 (8.68-11.47)      | 9.66 (8.39-11.12)      | 11.08 (9.23-13.30)     | 0.07        |
| Conjugated                      | 85.54 (65.53-103.97)                     | 91.50 (70.42-118.88)   | 71.97 (55.25-93.74)    | 87.85 (64.53-119.59)   | 0.42        |
| 16-Ketoestradiol                | 19.11 (15.64-23.35)                      | 19.11 (15.26-23.94)    | 16.53 (13.07-20.92)    | 19.16 (14.43-25.45)    | 0.94        |
| 16-Epiestriol                   | 21.54 (16.71-27.75)                      | 20.41 (15.66-26.60)    | 17.36 (13.07-23.07)    | 24.02 (17.57-32.82)    | 0.54        |
| 17-Epiestriol                   | 27.77 (21.30-36.18)                      | 31.01 (23.49-40.94)    | 27.98 (20.94-37.37)    | 26.33 (19.32-35.88)    | 0.70        |

Geometric means adjusted for age at blood draw (continuous), blood draw year (2013, 2014, 2015), smoking status (never, former, current, missing), diabetes (yes, no, missing), time since menopause ( $\leq 2$ , 3-5, 6-10,  $>10$ , missing), ever used oral contraceptives (yes, no, missing) and categorical current BMI

$p$ -value for trend was estimated using the Wald test, all FDR  $q$ -values  $\geq 0.20$

**Supplemental Table 2.** Geometric means (pmol/L) and 95% CIs of serum estrogens/estrogen metabolites by skin lightener use (number of years) characteristics in postmenopausal control women not using menopausal hormone therapy in the Ghana Breast Health Study

|                                 | Geometric Means (95% Confidence Intervals) |                        |                        |                        |                        | p-trend      | (>20 years vs. <1 year) |               |
|---------------------------------|--------------------------------------------|------------------------|------------------------|------------------------|------------------------|--------------|-------------------------|---------------|
|                                 | <1 year                                    | 1-5 years              | 6-10 years             | 11-20 years            | >20 years              |              | %Δ                      | p-diff        |
| Estrone                         | 360.74 (250.58-519.32)                     | 393.58 (231.60-668.83) | 328.48 (204.09-528.69) | 407.89 (188.38-883.23) | 383.90 (230.27-640.05) | 0.771        | 6.4                     | 0.591         |
| Conjugated                      | 64.86 (54.24-77.56)                        | 72.92 (54.15-98.18)    | 64.64 (48.71-85.78)    | 66.46 (43.86-100.70)   | 67.33 (49.20-92.15)    | 0.876        | 3.8                     | 0.750         |
| Unconjugated                    | 284.53 (186.48-434.12)                     | 291.91 (154.38-551.98) | 255.08 (148.28-438.81) | 318.20 (128.64-787.12) | 292.08 (157.72-540.90) | 0.684        | 2.7                     | 0.563         |
| Estradiol                       | 35.17 (26.07-47.46)                        | 33.69 (20.78-54.63)    | 29.20 (18.73-45.53)    | 36.69 (17.40-77.37)    | 29.62 (17.81-49.26)    | 0.514        | -15.8                   | 0.804         |
| Conjugated                      | 23.35 (17.72-30.76)                        | 23.55 (14.75-37.60)    | 20.42 (13.23-31.51)    | 21.93 (10.83-44.40)    | 20.33 (12.47-33.14)    | 0.610        | -12.9                   | 0.891         |
| Unconjugated                    | 6.15 (3.24-11.65)                          | 7.04 (3.17-15.66)      | 3.99 (1.72-9.26)       | 9.86 (3.26-29.84)      | 5.23 (2.20-12.41)      | 0.935        | -15                     | 0.842         |
| 2-Hydroxyestrone                | 57.80 (51.29-65.13)                        | 58.02 (45.92-73.30)    | 56.47 (46.24-68.96)    | 57.16 (39.01-83.74)    | 55.71 (44.71-69.42)    | 0.462        | -3.6                    | 0.540         |
| 2-Hydroxyestradiol              | 9.13 (6.92-12.04)                          | 8.84 (6.14-12.73)      | 7.41 (5.10-10.78)      | 9.58 (6.19-14.82)      | 8.74 (6.01-12.70)      | 0.208        | -4.3                    | 0.309         |
| 2-Methoxyestrone                | 21.51 (18.11-25.56)                        | 20.90 (15.58-28.05)    | 22.19 (16.12-30.54)    | 24.38 (16.61-35.78)    | 18.46 (14.19-24.00)    | 0.730        | -14.2                   | 0.293         |
| Conjugated                      | 8.75 (7.19-10.65)                          | 10.18 (7.34-14.10)     | 10.50 (7.55-14.59)     | 8.38 (5.29-13.28)      | 7.12 (5.27-9.61)       | 0.571        | -18.6                   | 0.996         |
| Unconjugated                    | 10.59 (8.24-13.60)                         | 7.39 (4.49-12.15)      | 7.75 (4.59-13.07)      | 12.37 (5.57-27.46)     | 10.26 (6.92-15.19)     | 0.925        | -3.1                    | 0.880         |
| 2-Methoxyestradiol              | 12.65 (10.05-15.93)                        | 13.32 (9.76-18.18)     | 14.22 (10.38-19.47)    | 11.72 (8.23-16.68)     | 10.21 (7.58-13.76)     | 0.936        | -19.3                   | 0.348         |
| Conjugated                      | 3.04 (2.49-3.72)                           | 3.60 (2.75-4.70)       | 3.24 (2.49-4.22)       | 3.05 (2.11-4.41)       | 3.32 (2.55-4.34)       | 0.353        | 9.2                     | 0.546         |
| Unconjugated                    | 8.60 (6.20-11.92)                          | 8.26 (4.96-13.75)      | 9.90 (6.33-15.50)      | 8.40 (5.29-13.34)      | 5.75 (3.46-9.57)       | 0.430        | -33.1                   | 0.951         |
| 2-Hydroxyestrone-3-methyl ether | 3.60 (2.96-4.39)                           | 3.15 (2.36-4.21)       | 4.19 (3.09-5.67)       | 4.88 (3.15-7.56)       | 2.87 (2.11-3.90)       | 0.268        | -20.3                   | 0.070         |
| 4-Hydroxyestrone                | 7.28 (5.36-9.90)                           | 7.47 (4.69-11.89)      | 8.46 (5.76-12.42)      | 10.56 (5.96-18.69)     | 7.74 (4.92-12.17)      | 0.067        | 6.3                     | 0.146         |
| 4-Methoxyestrone                | 3.60 (2.97-4.37)                           | 3.38 (2.51-4.53)       | 3.61 (2.80-4.65)       | 3.32 (2.34-4.72)       | 3.01 (2.29-3.95)       | 0.885        | -16.4                   | 0.410         |
| 4-Methoxyestradiol              | 1.46 (1.17-1.83)                           | 1.50 (1.05-2.15)       | 1.74 (1.26-2.42)       | 1.56 (0.99-2.47)       | 1.28 (0.92-1.77)       | 0.371        | -12.3                   | 0.209         |
| 16α-Hydroxyestrone              | 34.96 (26.17-46.69)                        | 42.68 (26.49-68.77)    | 31.05 (21.16-45.57)    | 32.65 (19.72-54.05)    | 33.96 (21.63-53.31)    | 0.943        | -2.9                    | 0.660         |
| Estriol                         | 82.02 (67.56-99.58)                        | 95.08 (66.95-135.02)   | 69.75 (52.49-92.68)    | 98.12 (70.19-137.17)   | 84.27 (58.21-121.98)   | <b>0.027</b> | 2.7                     | <b>0.003*</b> |
| Conjugated                      | 9.53 (8.40-10.81)                          | 9.70 (7.96-11.83)      | 8.89 (7.55-10.47)      | 12.10 (8.40-17.43)     | 10.07 (8.21-12.34)     | 0.198        | 5.7                     | 0.284         |
| Unconjugated                    | 69.89 (56.25-86.85)                        | 83.20 (56.56-122.38)   | 60.76 (44.38-83.20)    | 80.71 (53.74-121.22)   | 72.10 (48.21-107.84)   | <b>0.018</b> | 3.2                     | <b>0.002*</b> |
| 16-Ketoestradiol                | 17.50 (14.01-21.84)                        | 21.90 (15.45-31.03)    | 15.03 (11.12-20.31)    | 19.66 (12.26-31.53)    | 18.32 (12.50-26.86)    | 0.374        | 4.7                     | 0.277         |

|               |                         |                         |                         |                         |                         |       |      |       |
|---------------|-------------------------|-------------------------|-------------------------|-------------------------|-------------------------|-------|------|-------|
| 16-Epiestriol | 18.83 (14.82-<br>23.93) | 20.34 (14.28-<br>28.97) | 17.45 (12.72-<br>23.95) | 26.74 (19.43-<br>36.82) | 18.00 (12.69-<br>25.52) | 0.400 | -4.4 | 0.395 |
| 17-Epiestriol | 27.75 (21.51-<br>35.78) | 20.85 (14.37-<br>30.25) | 27.47 (19.91-<br>37.91) | 32.47 (22.69-<br>46.45) | 25.27 (17.69-<br>36.09) | 0.609 | -8.9 | 0.399 |

Geometric means adjusted for age at blood draw (continuous), blood draw year (2013, 2014, 2015), smoking status (never, former, current, missing), diabetes (yes, no, missing), time since menopause ( $\leq 2$ , 3-5, 6-10,  $>10$ , missing), ever used oral contraceptives (yes, no, missing).

*p*-value trend was estimated using the Wald test

% $\Delta$  indicates the percentage change in estrogen/estrogen metabolite levels, comparing women reporting ever skin lightener use vs never use and was estimated by taking the ratio of the geometric mean difference in estrogen/estrogen metabolite levels between women who used skin lightener users  $>20$  years to the geometric mean of women reported  $<1$  year of skin lightener use, multiplied by 100

\*indicates FDR *q*-values  $< 0.1$
